# Supplementary material
Source: ML conference proceedings conference paper supplement (https://proceedings.neurips.cc/paper_files/paper/2009/hash/621bf66ddb7c962aa0d22ac97d69b793-Abstract.html)
Supplement: Supplementary file [file 621bf66ddb7c962aa0d22ac97d69b793-Supplemental.zip]

# Auxiliary Material

## Efficient Learning using Forward-Backward Splitting

### A Batch Convergence Proofs and Corollaries

Before we begin the proofs, we provide a technical lemma.

**Lemma 5** (Bounding Step Differences). *Assume that the norms of the subgradients of the functions  $f$  and  $r$  are bounded as in Eq. (5):*

$$\|\partial f(\mathbf{w})\|^2 \leq Af(\mathbf{w}) + G^2, \quad \|\partial r(\mathbf{w})\|^2 \leq Ar(\mathbf{w}) + G^2.$$

Let  $\eta_{t+1} \leq \eta_{t+\frac{1}{2}} \leq \eta_t$  and suppose that  $\eta_t \leq 2\eta_{t+\frac{1}{2}}$ . If we use the FOBOS update of Eqs. (2) and (3), then for a constant  $c \leq 4$  and any vector  $\mathbf{w}^*$ ,

$$\begin{aligned} & 2\eta_t(1 - cA\eta_t)f(\mathbf{w}_t) + 2\eta_{t+\frac{1}{2}}(1 - cA\eta_{t+\frac{1}{2}})r(\mathbf{w}_{t+1}) \\ & \leq 2\eta_t f(\mathbf{w}^*) + 2\eta_{t+\frac{1}{2}} r(\mathbf{w}^*) + \|\mathbf{w}_t - \mathbf{w}^*\|^2 - \|\mathbf{w}_{t+1} - \mathbf{w}^*\|^2 + 7\eta_t \eta_{t+\frac{1}{2}} G^2. \end{aligned} \quad (12)$$

**Proof of Lemma 5** We begin with a few simple consequences of the forward-looking subgradient steps before proceeding with the core of the proof. Note first that for some  $\mathbf{g}_t^f \in \partial f(\mathbf{w}_t)$  and  $\mathbf{g}_{t+1}^r \in \partial r(\mathbf{w}_{t+1})$ , we have as in Eq. (4)

$$\mathbf{w}_{t+1} - \mathbf{w}_t = -\eta_t \mathbf{g}_t^f - \eta_{t+\frac{1}{2}} \mathbf{g}_{t+1}^r. \quad (13)$$

The definition of a subgradient implies that for any  $\mathbf{g}_{t+1}^r \in \partial r(\mathbf{w}_{t+1})$  (and similarly for any  $\mathbf{g}_t^f \in \partial f(\mathbf{w}_t)$  with  $f(\mathbf{w}_t)$  and  $f(\mathbf{w}^*)$ ) implies that

$$r(\mathbf{w}^*) \geq r(\mathbf{w}_{t+1}) + \langle \mathbf{g}_{t+1}^r, \mathbf{w}^* - \mathbf{w}_{t+1} \rangle \Rightarrow -\langle \mathbf{g}_{t+1}^r, \mathbf{w}_{t+1} - \mathbf{w}^* \rangle \leq r(\mathbf{w}^*) - r(\mathbf{w}_{t+1}). \quad (14)$$

From the Cauchy-Schwartz Inequality and Eq. (13), we obtain

$$\begin{aligned} \langle \mathbf{g}_{t+1}^r, (\mathbf{w}_{t+1} - \mathbf{w}_t) \rangle &= \langle \mathbf{g}_{t+1}^r, (-\eta_t \mathbf{g}_t^f - \eta_{t+\frac{1}{2}} \mathbf{g}_{t+1}^r) \rangle \\ &\leq \|\mathbf{g}_{t+1}^r\| \|\eta_{t+\frac{1}{2}} \mathbf{g}_{t+1}^r + \eta_t \mathbf{g}_t^f\| \leq \eta_{t+\frac{1}{2}} \|\mathbf{g}_{t+1}^r\|^2 + \eta_t \|\mathbf{g}_{t+1}^r\| \|\mathbf{g}_t^f\| \\ &\leq \eta_{t+\frac{1}{2}} (Ar(\mathbf{w}_{t+1}) + G^2) + \eta_t \max \{Af(\mathbf{w}_t) + G^2, Ar(\mathbf{w}_{t+1}) + G^2\}. \end{aligned} \quad (15)$$

We now proceed to bound the difference between  $\mathbf{w}^*$  and  $\mathbf{w}_{t+1}$ , and using a telescoping sum we will eventually bound  $f(\mathbf{w}_t) + r(\mathbf{w}_t) - f(\mathbf{w}^*) - r(\mathbf{w}^*)$ . First, we expand norm squared of the difference between  $\mathbf{w}_t$  and  $\mathbf{w}_{t+1}$ ,

$$\begin{aligned} \|\mathbf{w}_{t+1} - \mathbf{w}^*\|^2 &= \|\mathbf{w}_t - (\eta_t \mathbf{g}_t^f + \eta_{t+\frac{1}{2}} \mathbf{g}_{t+1}^r) - \mathbf{w}^*\|^2 \\ &= \|\mathbf{w}_t - \mathbf{w}^*\|^2 - 2 \left[ \eta_t \langle \mathbf{g}_t^f, \mathbf{w}_t - \mathbf{w}^* \rangle + \eta_{t+\frac{1}{2}} \langle \mathbf{g}_{t+1}^r, \mathbf{w}_t - \mathbf{w}^* \rangle \right] + \|\eta_t \mathbf{g}_t^f + \eta_{t+\frac{1}{2}} \mathbf{g}_{t+1}^r\|^2 \\ &= \|\mathbf{w}_t - \mathbf{w}^*\|^2 - 2\eta_t \langle \mathbf{g}_t^f, \mathbf{w}_t - \mathbf{w}^* \rangle + \|\eta_t \mathbf{g}_t^f + \eta_{t+\frac{1}{2}} \mathbf{g}_{t+1}^r\|^2 \\ &\quad - 2\eta_{t+\frac{1}{2}} [\langle \mathbf{g}_{t+1}^r, \mathbf{w}_{t+1} - \mathbf{w}^* \rangle - \langle \mathbf{g}_{t+1}^r, \mathbf{w}_{t+1} - \mathbf{w}_t \rangle]. \end{aligned} \quad (16)$$

We can bound the third term above by noting that

$$\begin{aligned} & \|\eta_t \mathbf{g}_t^f + \eta_{t+\frac{1}{2}} \mathbf{g}_{t+1}^r\|^2 \\ &= \eta_t^2 \|\mathbf{g}_t^f\|^2 + 2\eta_t \eta_{t+\frac{1}{2}} \langle \mathbf{g}_t^f, \mathbf{g}_{t+1}^r \rangle + \eta_{t+\frac{1}{2}}^2 \|\mathbf{g}_{t+1}^r\|^2 \\ &\leq \eta_t^2 Af(\mathbf{w}_t) + 2A\eta_t \eta_{t+\frac{1}{2}} \max \{f(\mathbf{w}_t), r(\mathbf{w}_{t+1})\} + \eta_{t+\frac{1}{2}}^2 Ar(\mathbf{w}_{t+1}) + 4\eta_t^2 G^2. \end{aligned}$$

We now use Eq. (15) to bound the last term of Eq. (16) and the above bound on  $\eta_t \mathbf{g}_t^f + \eta_{t+\frac{1}{2}} \mathbf{g}_{t+1}^r$  to get that

$$\begin{aligned}
& \|\mathbf{w}_{t+1} - \mathbf{w}^*\|^2 \\
& \leq \|\mathbf{w}_t - \mathbf{w}^*\|^2 - 2\eta_t \langle \mathbf{g}_t^f, \mathbf{w}_t - \mathbf{w}^* \rangle - 2\eta_{t+\frac{1}{2}} \langle \mathbf{g}_{t+1}^r, \mathbf{w}_{t+1} - \mathbf{w}^* \rangle + \|\eta_t \mathbf{g}_t^f + \eta_{t+\frac{1}{2}} \mathbf{g}_{t+1}^r\|^2 \\
& \quad + 2\eta_{t+\frac{1}{2}} \left( \eta_{t+\frac{1}{2}} Ar(\mathbf{w}_{t+1}) + 2A\eta_t \max\{f(\mathbf{w}_t), r(\mathbf{w}_{t+1})\} + 2\eta_t G^2 \right) \\
& \leq \|\mathbf{w}_t - \mathbf{w}^*\|^2 + 2\eta_t (f(\mathbf{w}^*) - f(\mathbf{w}_t)) + 2\eta_{t+\frac{1}{2}} (r(\mathbf{w}^*) - r(\mathbf{w}_t)) + 7\eta_t^2 G^2 \\
& \quad + \eta_t^2 Af(\mathbf{w}_t) + 3A\eta_t \eta_{t+\frac{1}{2}} \max\{f(\mathbf{w}_t), r(\mathbf{w}_t)\} + 2\eta_{t+\frac{1}{2}}^2 Ar(\mathbf{w}_{t+1}) \tag{17}
\end{aligned}$$

$$\begin{aligned}
& \leq \|\mathbf{w}_t - \mathbf{w}^*\|^2 + 7\eta_t^2 G^2 \\
& \quad + 2\eta_t (f(\mathbf{w}^*) - (1 - cA\eta_t)f(\mathbf{w}_t)) + 2\eta_{t+\frac{1}{2}} \left( r(\mathbf{w}^*) - (1 - cA\eta_{t+\frac{1}{2}})r(\mathbf{w}_{t+1}) \right) . \tag{18}
\end{aligned}$$

To obtain Eq. (17) we used the standard convexity bounds established earlier in Eq. (14). The final bound given by Eq. (18) is due to the fact that  $3A\eta_t \eta_{t+\frac{1}{2}} \leq 6A\eta_t^2$  and that for  $a, b \geq 0$ ,  $\max\{a, b\} \leq a + b$ . Moving the  $f(\cdot)$  and  $r(\cdot)$  terms to the left hand side of the  $\leq$  gives the desired inequality.  $\square$

Using the above lemma, the analysis for FOBOS in a batch setting is straightforward. In this setting we set  $\eta_{t+\frac{1}{2}} = \eta_{t+1}$  and update  $\mathbf{w}_t$  to  $\mathbf{w}_{t+1}$  as prescribed by Eq. (2) and Eq. (3).

**Proof of Theorem 1** Rearranging the  $f(\mathbf{w}^*)$  and  $r(\mathbf{w}^*)$  terms from the bound in lemma 5, we sum the loss terms over  $t$  from 1 through  $T$  and get a canceling telescoping sum:

$$\begin{aligned}
& \sum_{t=1}^T [\eta_t ((1 - cA\eta_t)f(\mathbf{w}_t) - f(\mathbf{w}^*)) + \eta_{t+1} ((1 - cA\eta_{t+1})r(\mathbf{w}_{t+1}) - r(\mathbf{w}^*))] \\
& \leq \|\mathbf{w}_1 - \mathbf{w}^*\|^2 - \|\mathbf{w}_{T+1} - \mathbf{w}^*\|^2 + 7G^2 \sum_{t=1}^T \eta_t^2 \leq \|\mathbf{w}_1 - \mathbf{w}^*\|^2 + 7G^2 \sum_{t=1}^T \eta_t^2 . \tag{19}
\end{aligned}$$

Now we bound the one-off  $r(\mathbf{w}_{t+1})$  terms by noting that

$$\begin{aligned}
& \sum_{t=1}^T \eta_{t+1} ((1 - cA\eta_{t+1})r(\mathbf{w}_{t+1}) - r(\mathbf{w}^*)) \\
& = \sum_{t=1}^T \eta_t ((1 - cA\eta_t)r(\mathbf{w}_t) - r(\mathbf{w}^*)) + \eta_{T+1} ((1 - cA\eta_{T+1})r(\mathbf{w}_{T+1}) - r(\mathbf{w}^*)) + \eta_1 r(\mathbf{w}^*) \\
& \geq \sum_{t=1}^T \eta_t ((1 - cA\eta_t)r(\mathbf{w}_{t+1}) - r(\mathbf{w}^*)) + r(\mathbf{w}^*)(\eta_1 - \eta_{T+1}) \\
& \geq \sum_{t=1}^T \eta_t ((1 - cA\eta_t)r(\mathbf{w}_t) - r(\mathbf{w}^*)) . \tag{20}
\end{aligned}$$

Using the fact that  $\|\mathbf{w}_1 - \mathbf{w}^*\| = \|\mathbf{w}^*\| \leq D$ , we combine Eq. (19) with Eq. (20) to get the desired bound.  $\square$

**Corollary 6** (Convergence of decreasing step sizes). *Assume that the conditions of Thm. 1 hold and the step sizes  $\eta_t$  are such that  $\eta_t \rightarrow 0$ , and that  $\sum_{t=1}^{\infty} \eta_t = \infty$ . Then*

$$\liminf_{t \rightarrow \infty} f(\mathbf{w}_t) + r(\mathbf{w}_t) - (f(\mathbf{w}^*) + r(\mathbf{w}^*)) = 0 .$$

We can give tighter convergence results when we assume that  $f$  and  $r$  are Lipschitz or when we can guarantee that the  $\|\partial f\|$  and  $\|\partial r\|$  are bounded. In this case, we have

**Corollary 7.** *In addition to the conditions of Thm. 1, assume that the norm of any subgradient from  $\partial f$  and the norm of any subgradient from  $\partial r$  are bounded by  $G$ . Then*

$$\min_{t \in \{1, \dots, T\}} (f(\mathbf{w}_t) + r(\mathbf{w}_t)) - (f(\mathbf{w}^*) + r(\mathbf{w}^*)) \leq \frac{D^2 + 7G^2 \sum_{t=1}^T \eta_t^2}{2 \sum_{t=1}^T \eta_t}. \quad (21)$$

**Corollary 8** (Optimal fixed step rate). *Assume that the conditions of Cor. 7 hold and that we run FOBOS for a predefined  $T$  iterations with  $\eta_t = \frac{D}{\sqrt{7TG}}$ . Then the following bound holds.*

$$\min_{i \in \{1, \dots, T\}} f(\mathbf{w}_t) + r(\mathbf{w}_t) - (f(\mathbf{w}^*) + r(\mathbf{w}^*)) \leq \frac{3DG}{\sqrt{T}}.$$

In corollaries 7 and 8, our assumption on bounded subgradients of the functions  $f$  and  $r$  is in practice not restrictive. If we know that an optimal  $\mathbf{w}^*$  lies in some closed and bounded set  $\Omega$  and that  $\Omega \subseteq \text{dom}(f + r)$ , then [17, Theorem 24.7] guarantees that  $\partial f$  and  $\partial r$  are bounded for  $\mathbf{w} \in \Omega$ . The lingering question is thus whether we can guarantee that such a set  $\Omega$  exists and that our iterates  $\mathbf{w}_t$  remain in  $\Omega$ . We now describe a simple setting to show that  $\partial f$  and  $\partial r$  are indeed often bounded. If  $r(\mathbf{w})$  is a norm and  $f$  is lower bounded by 0, then we know that  $r(\mathbf{w}^*) \leq f(\mathbf{w}^*) + r(\mathbf{w}^*) \leq f(\mathbf{w}_1) + r(\mathbf{w}_1)$ . Using standard bounds on norms, we get that for some  $\gamma > 0$

$$\|\mathbf{w}^*\|_\infty \leq \gamma r(\mathbf{w}^*) \leq \gamma(f(\mathbf{w}_1) + r(\mathbf{w}_1)) = \gamma f(\mathbf{w}_1),$$

where for the last inequality we used the assumption that  $r(\mathbf{w}_1) = 0$ . Thus, we obtain that  $\mathbf{w}^*$  lies in a hypercube. We can easily project onto this box by truncating elements of  $\mathbf{w}_t$  lying outside it at any iteration without affecting the bounds in Eq. (21). Concretely, this follows since Euclidean projection  $\Pi_\Omega$  to a convex set  $\Omega$  with  $\mathbf{w}^* \in \Omega$  satisfies  $\|\Pi_\Omega(\mathbf{w}_{t+1}) - \mathbf{w}^*\| \leq \|\mathbf{w}_{t+1} - \mathbf{w}^*\|$ . Further, so long as  $\Omega$  is a norm ball, we know that

$$r(\Pi_\Omega(\mathbf{w}_{t+1})) \leq r(\mathbf{w}_{t+1}). \quad (22)$$

Thus, looking at Eq. (17) in our proof of Theorem 1 we notice that  $r(\mathbf{w}^*) - r(\mathbf{w}_{t+1}) \leq r(\mathbf{w}^*) - r(\Pi_\Omega(\mathbf{w}_{t+1}))$  and the series of inequalities through Eq. (18) still hold (with  $A = 0$ ). In general, so long as Eq. (22) holds and  $\mathbf{w}^* \in \Omega$ , we can project  $\mathbf{w}_{t+1}$  into  $\Omega$  without affecting convergence guarantees.

## B Online Regret Proofs and Corollaries

**Proof of Theorem 3** Looking at lemma 5, we immediately see that if  $\|\partial f\|$  and  $\|\partial r\|$  are bounded by  $G$ ,

$$f_t(\mathbf{w}_t) - f_t(\mathbf{w}^*) + r(\mathbf{w}_{t+1}) - r(\mathbf{w}^*) \leq \frac{1}{2\eta_t} (\|\mathbf{w}_t - \mathbf{w}^*\|^2 - \|\mathbf{w}_{t+1} - \mathbf{w}^*\|^2) + \frac{7}{2} G^2 \eta_t. \quad (23)$$

Now we use Eq. (23) to obtain that

$$\begin{aligned} R_{f+r}(T) &= \sum_{t=1}^T (f_t(\mathbf{w}_t) - f_t(\mathbf{w}^*) + r(\mathbf{w}_t) - r(\mathbf{w}^*)) + r(\mathbf{w}_{T+1}) - r(\mathbf{w}^*) - r(\mathbf{w}_1) + r(\mathbf{w}^*) \\ &\leq GD + \sum_{t=1}^T \frac{1}{2\eta_t} (\|\mathbf{w}_t - \mathbf{w}^*\|^2 - \|\mathbf{w}_{t+1} - \mathbf{w}^*\|^2) + \frac{7G^2}{2} \sum_{t=1}^T \eta_t \end{aligned}$$

since  $r(\mathbf{w}) \leq r(\mathbf{0}) + G\|\mathbf{w}\| \leq GD$ . We can rewrite the above bound and see

$$\begin{aligned} R_{f+r}(T) &\leq GD + \frac{1}{2\eta_1} \|\mathbf{w}_1 - \mathbf{w}^*\|^2 + \frac{1}{2} \sum_{t=2}^T \|\mathbf{w}_t - \mathbf{w}^*\|^2 \left( \frac{1}{\eta_t} - \frac{1}{\eta_{t-1}} \right) + \frac{7G^2}{2} \sum_{t=1}^T \eta_t \\ &\leq GD + \frac{D^2}{2\eta_1} + \frac{D^2}{2} \sum_{t=2}^T \left( \frac{1}{\eta_t} - \frac{1}{\eta_{t-1}} \right) + \frac{7G^2}{2} \sum_{t=1}^T \eta_t, \end{aligned}$$

where we used again the bound on the distance of each  $\mathbf{w}_t$  to  $\mathbf{w}^*$  for the last inequality. Lastly, we use the fact that the sum  $\frac{1}{\eta_1} + \sum_{t=2}^T (\frac{1}{\eta_t} - \frac{1}{\eta_{t-1}})$  telescopes and get that

$$R_{f+r}(T) \leq GD + \frac{D^2}{2\eta_T} + \frac{7G^2}{2} \sum_{t=1}^T \eta_t .$$

Setting  $\eta_t = c/\sqrt{t}$  and recognizing as in [7] that  $\sum_{t=1}^T \eta_t \leq 2c\sqrt{T}$  concludes the proof.  $\square$

We assume as in Sec. 3 that we are minimizing  $f(\mathbf{w}) + r(\mathbf{w})$ . Suppose that on each step of FOBOS, we choose instead of some  $\mathbf{g}_t^f \in \partial f(\mathbf{w}_t)$  a stochastic estimate of the gradient  $\tilde{\mathbf{g}}_t^f$  where  $E[\tilde{\mathbf{g}}_t^f] \in \partial f(\mathbf{w}_t)$ . We assume that we still use the true  $r$  (which is generally easy, as it is simply the regularization function). It is straightforward to use Theorem 3 above as in the derivation of Theorems 2 and 3 from [14] to derive the following corollary on the convergence rate of stochastic FOBOS.

**Corollary 9.** *Assume that the conditions on  $\partial f$ ,  $\partial r$ , and  $\mathbf{w}^*$  hold as in the previous theorems and let FOBOS be run for  $T$  iterations. Let  $s$  be an integer chosen uniformly at random from  $\{1, \dots, T\}$ . If  $\eta_t = \frac{D}{4G\sqrt{t}}$ , then*

$$E_s[f(\mathbf{w}_s) + r(\mathbf{w}_s)] \leq f(\mathbf{w}^*) + r(\mathbf{w}^*) + \frac{2GD + 4GD\sqrt{T}}{T}.$$

With probability at least  $1 - \delta$ ,  $f(\mathbf{w}_s) + r(\mathbf{w}_s) \leq f(\mathbf{w}^*) + r(\mathbf{w}^*) + \frac{2GD + 4GD\sqrt{T}}{\delta T}$ .

## C High-dimensional Efficiency

**Proof of Proposition 4** It suffices to show that the proposition is correct for  $T = 2$  and then use an inductive argument, because the proposition trivially holds for  $T = 1$ . We provide here a direct proof for each norm separately by examining the updates we derived in Sec. 4 and showing that  $\mathbf{w}_2 = \mathbf{w}^*$ .

Note that the objective functions are separable for  $q = 1$ . Therefore, for  $\ell_1$ -regularization it suffices to prove the proposition for any component of the vector  $\mathbf{w}$ . We omit the index of the component and denote by  $w_0, w_1, w_2, w_3, \dots$  one coordinate of  $\mathbf{w}$  along the iterations of  $\mathcal{P}.1$  and by  $w^*$  the result for the same component when solving  $\mathcal{P}.2$ . We need to show that  $w^* = w_2$ . Expanding the  $\ell_1$ -update of Eq. (6) over two iterations we get the following:

$$\begin{aligned} w_2 &= \text{sign}(w_1) [|w_1| - \lambda_2]_+ = \text{sign}(w_1) [|\text{sign}(w_0) [|w_0| - \lambda_1]_+| - \lambda_2]_+ \\ &= \text{sign}(w_0) [|w_0| - \lambda_1 - \lambda_2]_+ , \end{aligned}$$

where we used the positivity of  $|\cdot|$ . Examining  $\mathcal{P}.2$  and using Eq. (6) again we get

$$w^* = \text{sign}(w_0) [|w_0| - \lambda_1 - \lambda_2]_+ .$$

Therefore,  $w^* = w_2$  as claimed.

Next we prove the proposition for  $\ell_2$ , returning to using the entire vector for the proof. Using the explicit  $\ell_2$ -update from Eq. (7), we can expand the norm of the vector  $\mathbf{w}_1$  due to the program  $\mathcal{P}.1$  as follows,

$$\|\mathbf{w}_1\| = \left[ 1 - \frac{\lambda_1}{\|\mathbf{w}_0\|} \right]_+ \|\mathbf{w}_0\| = [\|\mathbf{w}_0\| - \lambda_1]_+ .$$

Similarly, we get that  $\|\mathbf{w}_2\| = [\|\mathbf{w}_1\| - \lambda_2]_+$ . Combining the norm equalities we see that the norm of  $\mathbf{w}_2$  due to the succession of the two updates is

$$\|\mathbf{w}_2\| = [([\|\mathbf{w}_0\| - \lambda_1]_+ - \lambda_2)]_+ = [\|\mathbf{w}_0\| - \lambda_1 - \lambda_2]_+ .$$

Computing directly the norm of  $\mathbf{w}^*$  due to the update given by Eq. (7) yields

$$\|\mathbf{w}^*\| = \left[ 1 - \frac{\lambda_1 + \lambda_2}{\|\mathbf{w}_0\|} \right]_+ \|\mathbf{w}_0\| = [\|\mathbf{w}_0\| - \lambda_1 - \lambda_2]_+ .$$

Thus,  $\mathbf{w}^*$  and  $\mathbf{w}_2$  have the same norm. Since the update itself retains the direction of the original vector  $\mathbf{w}_0$ , we get that  $\mathbf{w}^* = \mathbf{w}_2$  as needed.

We now turn to the most complicated update and proof of the three norms, the  $\ell_\infty$  norm. We start by recapping the programs  $\mathcal{P}.1$  and  $\mathcal{P}.2$  for  $T = 2$  and  $q = \infty$ ,

$$\mathcal{P}.1 : \quad \mathbf{w}_1 = \underset{\mathbf{w}}{\operatorname{argmin}} \left\{ \frac{1}{2} \|\mathbf{w} - \mathbf{w}_0\|^2 + \lambda_1 \|\mathbf{w}\|_\infty \right\} \quad (24)$$

$$\mathbf{w}_2 = \underset{\mathbf{w}}{\operatorname{argmin}} \left\{ \frac{1}{2} \|\mathbf{w} - \mathbf{w}_1\|^2 + \lambda_2 \|\mathbf{w}\|_\infty \right\} , \quad (25)$$

$$\mathcal{P}.2 : \quad \mathbf{w}^* = \underset{\mathbf{w}}{\operatorname{argmin}} \left\{ \frac{1}{2} \|\mathbf{w} - \mathbf{v}\|_2^2 + (\lambda_1 + \lambda_2) \|\mathbf{w}\|_\infty \right\} . \quad (26)$$

We prove the equivalence of the two programs in two stages. First, we examine the case  $\|\mathbf{w}_0\|_1 > \lambda_1 + \lambda_2$ , and then consider the complement case  $\|\mathbf{w}_0\|_1 \leq \lambda_1 + \lambda_2$ . For concreteness and simplicity, we assume that  $\mathbf{w}_0 \succeq \mathbf{0}$ , since, clearly, the objective is symmetric in  $\mathbf{w}_0$  and  $-\mathbf{w}_0$ . We thus can assume that all entries of  $\mathbf{w}_0$  are non-negative. In the proof we use the following operators:  $[v]_+$  now denotes the positive component of each entry of  $\mathbf{v}$ ,  $\min\{\mathbf{v}, \theta\}$  denotes the component-wise minimum between the elements of  $\mathbf{v}$  and  $\theta$ , and likewise  $\max\{\mathbf{v}, \theta\}$  is the component-wise maximum. Starting with the case  $\|\mathbf{w}_0\|_1 > \lambda_1 + \lambda_2$ , we examine Eq. (24). From Lagrange duality we know that that  $\mathbf{w}_1 = \mathbf{w}_0 - \boldsymbol{\alpha}_1$ , where  $\boldsymbol{\alpha}_1$  is the solution of

$$\min_{\boldsymbol{\alpha}} \frac{1}{2} \|\boldsymbol{\alpha} - \mathbf{w}_0\|_2^2 \quad \text{s.t.} \quad \|\boldsymbol{\alpha}\|_1 \leq \lambda_1 .$$

As described by [6] and reviewed above in Sec. 4,  $\boldsymbol{\alpha}_1 = [\mathbf{w}_0 - \theta_1]_+$  for some  $\theta_1 \in \mathbb{R}_+$ . The form of  $\boldsymbol{\alpha}_1$  readily translates to the following form for  $\mathbf{w}_1$ :  $\mathbf{w}_1 = \mathbf{w}_0 - \boldsymbol{\alpha}_1 = \min(\mathbf{w}_0, \theta_1)$ . Applying similar reasoning to the second step of  $\mathcal{P}.1$  yields  $\mathbf{w}_2 = \mathbf{w}_1 - \boldsymbol{\alpha}_2 = \mathbf{w}_0 - \boldsymbol{\alpha}_1 - \boldsymbol{\alpha}_2$ , where  $\boldsymbol{\alpha}_2$  is the minimizer of

$$\frac{1}{2} \|\boldsymbol{\alpha} - \mathbf{w}_1\|_2^2 = \frac{1}{2} \|\boldsymbol{\alpha} - (\mathbf{w}_0 - \boldsymbol{\alpha}_1)\|_2^2 \quad \text{s.t.} \quad \|\boldsymbol{\alpha}\|_1 \leq \lambda_2 .$$

Again, we have  $\boldsymbol{\alpha}_2 = [\mathbf{w}_1 - \theta_2]_+ = [\mathbf{w}_0 - \boldsymbol{\alpha}_1 - \theta_2]_+$  for some  $\theta_2 \in \mathbb{R}_+$ . The successive steps then imply that

$$\mathbf{w}_2 = \min\{\mathbf{w}_1, \theta_2\} = \min\{\min\{\mathbf{w}_0, \theta_1\}, \theta_2\} .$$

We next show that regardless of the  $\ell_1$ -norm of  $\mathbf{w}_0$ ,  $\theta_2 \leq \theta_1$ . Intuitively, if  $\theta_2 > \theta_1$ , the second minimization step of  $\mathcal{P}.1$  would perform no shrinkage of  $\mathbf{w}_1$  to get  $\mathbf{w}_2$ . Formally, assume for the sake of contradiction that  $\theta_2 > \theta_1$ . Under this assumption, we would have that  $\mathbf{w}_2 = \min\{\min\{\mathbf{w}_0, \theta_1\}, \theta_2\} = \min\{\mathbf{w}_0, \theta_1\} = \mathbf{w}_1$ . In turn, we obtain that  $\mathbf{0}$  belongs to the subgradient set of Eq. (25) when evaluated at  $\mathbf{w} = \mathbf{w}_1$ , thus,

$$\mathbf{0} \in \mathbf{w}_1 - \mathbf{w}_1 + \lambda_2 \partial \|\mathbf{w}_1\|_\infty = \lambda_2 \partial \|\mathbf{w}_1\|_\infty .$$

Clearly, the set  $\partial \|\mathbf{w}_1\|_\infty$  can contain  $\mathbf{0}$  only when  $\mathbf{w}_1 = \mathbf{0}$ . Since we assumed that  $\lambda_1 < \|\mathbf{w}_0\|_1$ , and hence that  $\boldsymbol{\alpha}_1 \preceq \mathbf{w}_0$  and  $\boldsymbol{\alpha}_1 \neq \mathbf{w}_0$ , we have that  $\mathbf{w}_1 = \mathbf{w}_0 - \boldsymbol{\alpha}_1 \neq \mathbf{0}$ . This contradiction implies that  $\theta_2 \leq \theta_1$ .

We now examine the solution vectors to the dual problems of  $\mathcal{P}.1$ ,  $\boldsymbol{\alpha}_1$  and  $\boldsymbol{\alpha}_2$ . We know that  $\|\boldsymbol{\alpha}_1\|_1 = \lambda_1$  so that  $\|\mathbf{w}_0 - \boldsymbol{\alpha}_1\|_1 > \lambda_2$  and hence  $\boldsymbol{\alpha}_2$  is at the boundary  $\|\boldsymbol{\alpha}_2\|_1 = \lambda_2$  (see again [6]). Furthermore, the sum of these vectors is

$$\boldsymbol{\alpha}_1 + \boldsymbol{\alpha}_2 = [\mathbf{w}_0 - \theta_1]_+ + [\mathbf{w}_0 - [\mathbf{w}_0 - \theta_1]_+ - \theta_2]_+ . \quad (27)$$

Let  $v$  denote a component of  $\mathbf{w}_0$  greater than  $\theta_1$ . For any such component the right hand side of Eq. (27) amounts to

$$[v - (v - \theta_1) - \theta_2]_+ + [v - \theta_1]_+ = [\theta_1 - \theta_2]_+ + v - \theta_1 = v - \theta_1 = [v - \theta_1]_+ ,$$

where we used the fact that  $\theta_2 \leq \theta_1$  to eliminate the term  $[\theta_1 - \theta_2]_+$ . Next, let  $u$  denote a component of  $\mathbf{w}_0$  smaller than  $\theta_1$ . In this case, the right hand side of Eq. (27) amounts to  $[u - 0 - \theta_2]_+ + 0 =$

$[u - \theta_2]_+$ . Recapping, the end result is that the vector sum  $\alpha_1 + \alpha_2$  equals  $[w_0 - \theta_2]_+$ . Moreover,  $\alpha_1$  and  $\alpha_2$  are in  $\mathbb{R}_+^n$  as we assumed that  $w_0 \succeq \mathbf{0}$ , and thus

$$\| [w_0 - \theta_2]_+ \|_1 = \|\alpha_1 + \alpha_2\|_1 = \lambda_1 + \lambda_2. \quad (28)$$

We now show that  $\mathcal{P}.2$  has the same dual solution as the sequential updates above. The dual of  $\mathcal{P}.2$  is

$$\min_{\alpha} \frac{1}{2} \|\alpha - w_0\|_2^2 \quad \text{s.t.} \quad \|\alpha\|_1 \leq \lambda_1 + \lambda_2.$$

Denoting by  $\alpha_0$  the solution of the above dual problem, we have  $w^* = w_0 - \alpha_0$  and  $\alpha_0 = [w_0 - \theta]_+$  for some  $\theta \in \mathbb{R}_+$ . Examining the norm of  $\alpha_0$  we obtain that

$$\|\alpha_0\|_1 = \|[w_0 - \theta]_+\|_1 = \lambda_1 + \lambda_2 \quad (29)$$

because we assumed that  $\|w_0\|_1 > \lambda_1 + \lambda_2$ . We can view the terms  $\|[w_0 - \theta_2]_+\|_1$  from Eq. (28) and  $\|[w_0 - \theta]_+\|_1$  from Eq. (29) as functions of  $\theta_2$  and  $\theta$ , respectively. The functions are strictly decreasing functions of  $\theta$  and  $\theta_2$  over the interval  $[0, \|w_0\|_\infty]$ . Therefore, they are invertible for  $0 < \lambda_1 + \lambda_2 < \|w_0\|_1$ . Since  $\|[w_0 - \theta]_+\|_1 = \|[w_0 - \theta_2]_+\|_1$ , we must have  $\theta_2 = \theta$ . Recall that the solution of Eq. (26) is  $w^* = \min\{w_0, \theta\}$ , and the solution of the sequential update induced by Eq. (24) and Eq. (25) is  $\min\{\min\{w_0, \theta_1\}, \theta_2\} = \min\{w_0, \theta_2\}$ . The programs  $\mathcal{P}.1$  and  $\mathcal{P}.2$  therefore result in the same vector  $\min\{w_0, \theta_2\} = \min\{w_0, \theta\}$  and their induced updates are equivalent.

We now examine the case when  $\|w_0\|_1 \leq \lambda_1 + \lambda_2$ . If the 1-norm of  $w_0$  is also smaller than  $\lambda_1$ ,  $\|w_0\|_1 \leq \lambda_1$ , then the dual solution for the first step of  $\mathcal{P}.1$  is  $\alpha_1 = w_0$ , which makes  $w_1 = w_0 - \alpha_1 = \mathbf{0}$  and hence  $w_2 = \mathbf{0}$ . The dual solution for the combined problem is clearly  $\alpha_0 = w_0$ ; again,  $w^* = w_0 - \alpha_0 = \mathbf{0}$ . We are thus left with the case  $\lambda_1 < \|w_0\|_1 \leq \lambda_1 + \lambda_2$ . We straightforwardly get that the solution to Eq. (26) is  $w^* = \mathbf{0}$ . We now prove that the iterated solution obtained by  $\mathcal{P}.1$  results in the zero vector as well. First, consider the dual solution  $\alpha_1$ , which is the minimizer of  $\|\alpha - w_0\|^2$  subject to  $\|\alpha\|_1 \leq \lambda_1$ . Since  $\alpha_1 = [w_0 - \theta_1]_+$  for some  $\theta_1 \geq 0$ , we know that each component of  $\alpha_1$  is between zero and its corresponding component in  $w_0$ , therefore,  $\|w_0 - \alpha_1\|_1 = \|w_0\|_1 - \|\alpha_1\|_1 = \|w_0\|_1 - \lambda_1 \leq \lambda_2$ . The dual of the second step of  $\mathcal{P}.1$  distills to the minimization  $\frac{1}{2} \|\alpha - (w_0 - \alpha_1)\|^2$  subject to  $\|\alpha\|_1 \leq \lambda_2$ . Since we showed that  $\|w_0 - \alpha_1\|_1 \leq \lambda_2$ , we get  $\alpha_2 = w_0 - \alpha_1$ . This means that  $\theta_2 = 0$ . Recall that the solution of  $\mathcal{P}.1$  is  $\min\{w_0, \theta_2\}$ , which amounts to the zero vector when  $\theta_2 = 0$ . We have thus showed that both optimization problems result in the zero vector. This proves the equivalence of  $\mathcal{P}.1$  and  $\mathcal{P}.2$  for  $q = \infty$ .  $\square$
